# Supplementary material
Source: ML conference proceedings conference paper supplement (https://openreview.net/forum?id=47qVX2pa-2)
Supplement: supplementary_material [file attachment]

---

# Appendix

---

**Frédéric Piedboeuf**  
RALI, Diro  
Université de Montréal  
frederic.piedboeuf@umontreal.ca

**Philippe Langlais**  
RALI, Diro  
Université de Montréal  
felipe@iro.umontreal.ca

|                | Best            | T5-f     | T5-e     | T5-m             | T5-a     |
|----------------|-----------------|----------|----------|------------------|----------|
| Papyrus-f      | <b>30.4/3.6</b> | 20.1/0.6 | 12.1/0.2 | 20.0/0.4         | 18.8/0.6 |
| Papyrus-e      | <b>34.6/4.3</b> | 2.8/0    | 24.3/0.5 | 24.1/0.7         | 15.6/0.3 |
| Papyrus-m      | <b>30.6/3.4</b> | 11.9/0.3 | 18.2/0.3 | 22.0/0.6         | 17.1/0.5 |
| Papyrus-a      | <b>22.6/3.0</b> | 13.4/0.4 | 13.4/0.4 | 12.4/0.4         | 13.4/0.3 |
| Wikinews (fr)  | <b>27.4/0.5</b> | 20.4/0.3 | 7.0/0    | 21.8/ <b>1.2</b> | 16.4/0.3 |
| cacis57 (es)   | <b>48.0/0</b>   | 21.6/0   | 19.1/0   | 27.4/0           | 13.6/0   |
| wicc 78 (es)   | <b>30.1/0</b>   | 13.1/0   | 12.4/0   | 20.4/0           | 11.2/0   |
| 110ptbnkp (pt) | <b>21.4/0</b>   | 6.6/0    | 4.2/0    | 8.9/0            | 5.4/0    |
| pak2018 (pl)   | <b>7.4/4.6</b>  | 0/0      | 0.3/0    | 0.5/0            | 0/0      |
| Inspec         | <b>28.5/1.4</b> | 2.3/0    | 19.3/0.3 | 20.7/0.3         | 9.8/0.1  |
| NUS            | <b>35.7/3.0</b> | 3.5/0    | 24.8/1.0 | 24.4/1.4         | 15.9/0.5 |
| SemEval        | <b>22.9/1.6</b> | 2.2/0    | 17.1/0.2 | 15.6/0.4         | 10.6/0.1 |
| Kp20K          | <b>30.5/5.0</b> | 1.1/0    | 17.6/0.4 | 17.1/0.5         | 10.5/0.2 |
| Krapivin       | <b>28.0/5.8</b> | 1.3/0    | 15.9/0.5 | 15.7/0.6         | 10.0/0.2 |

Table 1: F1@10 present/R@10 absent, on all sets for T5. Best represents the best results reported by any system in the paper. We notice that T5 underperforms, getting better R@10 only on the Wikinews dataset. We found that T5 was faster to converge but overfitted easily.
