# Supplementary material
Source: ML conference proceedings conference paper supplement (https://openreview.net/forum?id=47qVX2pa-2)
Supplement: supplementary_material [file attachment]

---

# Author Statement

---

**Frédéric Piedboeuf**  
RALI, Diro  
Université de Montréal  
frederic.piedboeuf@umontreal.ca

**Philippe Langlais**  
RALI, Diro  
Université de Montréal  
felipe@iro.umontreal.ca

- <sup>1</sup> We assume responsibility in case of violation of rights and confirm that the dataset is released
- <sup>2</sup> under the creative common license.
